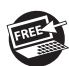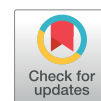

RESPONSE TO COMMENT ON REDONDO ET AL.

# Racial/Ethnic Minority Youth With Recent-Onset Type 1 Diabetes Have Poor Prognostic Factors. Diabetes Care 2018;41:1017–1024

Diabetes Care 2018;41:e125–e126 | <https://doi.org/10.2337/dci18-0017>

Maria Jose Redondo,<sup>1</sup> Ingrid Libman,<sup>2</sup> Peiyao Cheng,<sup>3</sup> Craig Kollman,<sup>3</sup> Mustafa Tosur,<sup>1</sup> Robin L. Gal,<sup>3</sup> Fida Bacha,<sup>1</sup> Georgeanna J. Klingensmith,<sup>4</sup> and Mark Clements,<sup>5,6</sup> for the Pediatric Diabetes Consortium

We thank Dr. Nwosu for his thoughtful comments (1). We agree that insulin resistance influences insulin dose-adjusted hemoglobin A<sub>1c</sub> (IDAA1c). Nagl et al. (2) observed that the partial remission period was less frequent and shorter in girls than boys, but, without C-peptide measurements, the authors could only speculate that higher insulin resistance or lower insulin secretion might explain their findings. However, we found that, adjusting for BMI, age, and sex, insulin doses were still different between African Americans (AAs) and non-Hispanic whites (NHWs) ( $P < 0.001$ ) (3), suggesting that after controlling for factors that increase insulin resistance there was still a difference in insulin dose, and thus in IDAA1c. Other measures of partial remission period, e.g., insulin dose, are also affected by insulin resistance. Furthermore, although defining partial remission period based on absolute threshold of insulin secretion, as measured by C-peptide, may work well in lean, white children, the same level of insulin secretion may be insufficient in the setting of insulin resistance induced by older age, puberty, female sex, or race. Therefore, measures of partial remission period that are influenced by insulin resistance, such as IDAA1c, may better reflect sufficiency of residual insulin secretion than an absolute

C-peptide value. We agree that IDAA1c also is influenced by vagaries in determination of insulin dose (e.g., self-reported insulin dose may be uncertain), which could result in misestimating insulin secretion. Overall, we agree with Nwosu (1) on the advantages of developing and validating IDAA1c thresholds for different races and ethnicities, sex, age, pubertal stage, weight, and other influential characteristics, although the use of multiple cut points may prove difficult to integrate in analyses.

We acknowledged that AAs have higher HbA<sub>1c</sub> than whites for the same mean glucose concentrations (4). Of note, the observed differences in IDAA1c between NHWs and AAs were larger, particularly at 6 and 12 months (1.8% and 1.7%, adjusted for age and sex) (3) than expected based on the race-related difference in HbA<sub>1c</sub> of 0.4% (4). If this 0.4% “correction” is applied to our data, differences between NHW and AA children at 6 and 12 months are reduced (1.4% and 1.3%) but still significantly different ( $P < 0.001$ ) at both time points. Furthermore, although HbA<sub>1c</sub> difference increased between 6 and 36 months, the difference in IDAA1c was largest at 6 months and progressively decreased at 12, 24, and 36 months. This observation supports that the presence or absence of partial

remission period during the first year after onset explains a considerable part of IDAA1c differences, and as partial remission period rarely persists in all groups beyond the first year, IDAA1c values become more similar.

As AAs have better lipid profiles at similar degrees of adiposity than NHWs (5), their similar dyslipidemia frequencies could in fact reflect worse glycemia in AAs.

Finally, we agree with Nwosu’s conclusion that more funding is needed to develop and validate a definition of partial remission period in nonwhite races and ethnicities. We hope that our article has highlighted additional racial/ethnic differences that warrant further research.

**Funding.** C.K. reports grant funding from JDRF and The Leona M. and Harry B. Helmsley Charitable Trust.

**Duality of Interest.** The Pediatric Diabetes Consortium and its activities are supported by the Jaeb Center for Health Research Foundation through unrestricted grants from Novo Nordisk, Inc.; Boehringer Ingelheim; and Takeda. I.L. is a paid consultant for Novo Nordisk, Inc. P.C. and R.L.G. have grant funding from Novo Nordisk, Inc.; Boehringer Ingelheim; and Takeda. C.K. reports consulting fees to his institution from Diasome and grant funding from Novo Nordisk, Inc.; Boehringer Ingelheim; Takeda; Tandem; and Minimed. G.J.K. has grant funding from Novo Nordisk, Inc.; Boehringer Ingelheim; and Takeda.

<sup>1</sup>Baylor College of Medicine, Texas Children’s Hospital, Houston, TX

<sup>2</sup>Division of Pediatric Endocrinology and Diabetes, Children’s Hospital of Pittsburgh of University of Pittsburgh Medical Center, Pittsburgh, PA

<sup>3</sup>Jaeb Center for Health Research, Tampa, FL

<sup>4</sup>Barbara Davis Center for Childhood Diabetes, Department of Pediatrics, University of Colorado, Aurora, CO

<sup>5</sup>Children’s Mercy Kansas City, Kansas City, MO

<sup>6</sup>University of Missouri-Kansas City, Kansas City, MO

Corresponding author: Maria Jose Redondo, [redondo@bcm.edu](mailto:redondo@bcm.edu).

© 2018 by the American Diabetes Association. Readers may use this article as long as the work is properly cited, the use is educational and not for profit, and the work is not altered. More information is available at <http://www.diabetesjournals.org/content/license>.

M.C. is a paid consultant for Medtronic and Novo Nordisk, Inc. No other potential conflicts of interest relevant to this article were reported.

## References

1. Nwosu BU. Comment on Redondo et al. Racial/ethnic minority youth with recent-onset type 1 diabetes have poor prognostic factors. *Diabetes Care* 2018;41:1017–1024 (Letter). *Diabetes Care* 2018;41:e123–e124. DOI: 10.2337/dc18-0483
2. Nagl K, Hermann JM, Plamper M, et al. Factors contributing to partial remission in type 1 diabetes: analysis based on the insulin dose-adjusted HbA<sub>1c</sub> in 3657 children and adolescents from Germany and Austria. *Pediatr Diabetes* 2017;18:428–434
3. Redondo MJ, Libman I, Cheng P, et al.; Pediatric Diabetes Consortium. Racial/ethnic minority youth with recent-onset type 1 diabetes have poor prognostic factors. *Diabetes Care* 2018;41:1017–1024
4. Bergenstal RM, Gal RL, Connor CG, et al.; T1D Exchange Racial Differences Study Group. Racial differences in the relationship of glucose concentrations and hemoglobin A<sub>1c</sub> levels. *Ann Intern Med* 2017;167:95–102
5. Bacha F, Saad R, Gungor N, Janosky J, Arslanian SA. Obesity, regional fat distribution, and syndrome X in obese black versus white adolescents: race differential in diabetogenic and atherogenic risk factors. *J Clin Endocrinol Metab* 2003;88:2534–2540
